# Supplementary material
Source: publisher site journal article supplement (https://www.dovepress.com/article/459496)
Supplement: Supplementary file 1 [file get_supplementary_file.php]

**supplementary material**

**Figure S1 Microbiota Analysis of Lower Airway Secretions**


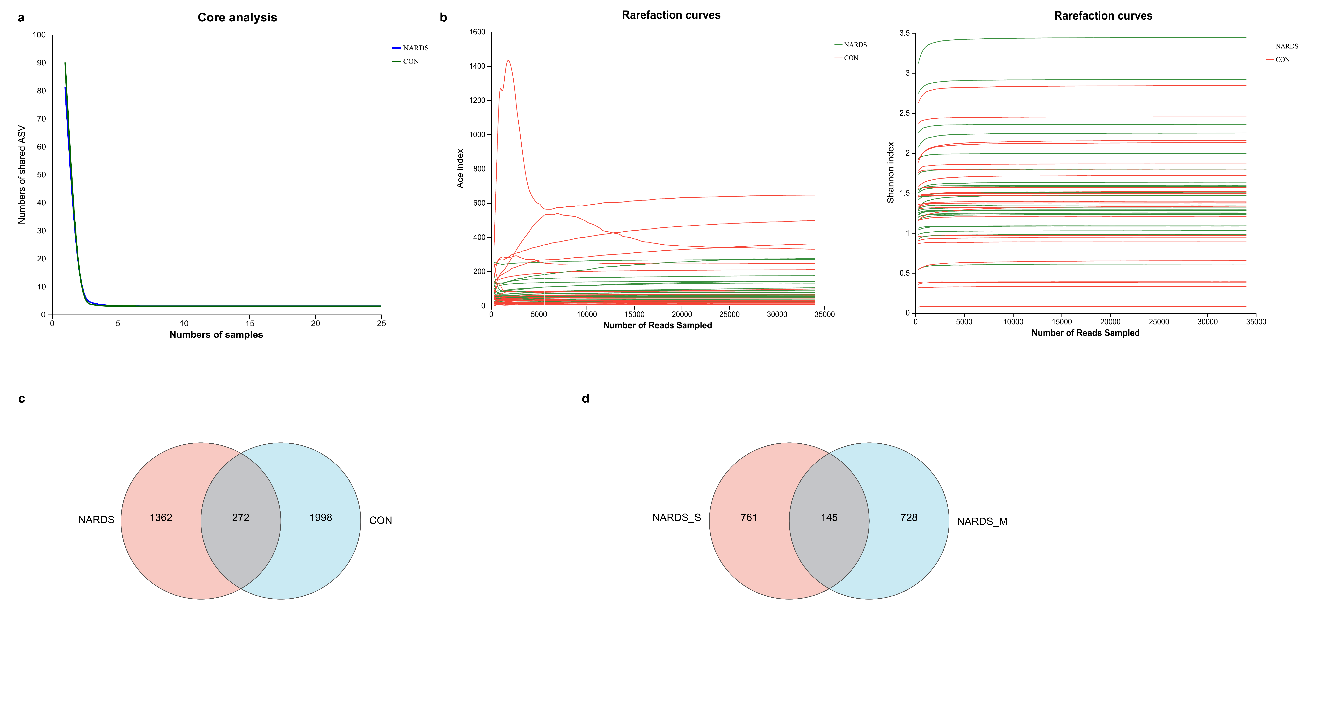


1. The Core curve showed an insignificant increase in core species amount with increasing sample size. (b) ACE and Shannon index rarefaction curves showed that ASV levels gradually plateau as sequencing depth increased. (c) Venn diagram illustrated the shared and unique OTUs in the lower airway secretions between the NARDS and control groups. (d) Venn diagram illustrated the shared and unique OTUs in the lower airway secretions between the NARDS_S and NARDS_M groups.

**Abbreviations:** ASV, amplicon sequence variant; NARDS, neonatal acute respiratory distress syndrome; CON, control; NARDS_S, moderate to severe NARDS; NARDS_M, mild NARDS.

**Figure S2 Microbiota Analysis of Feces.**


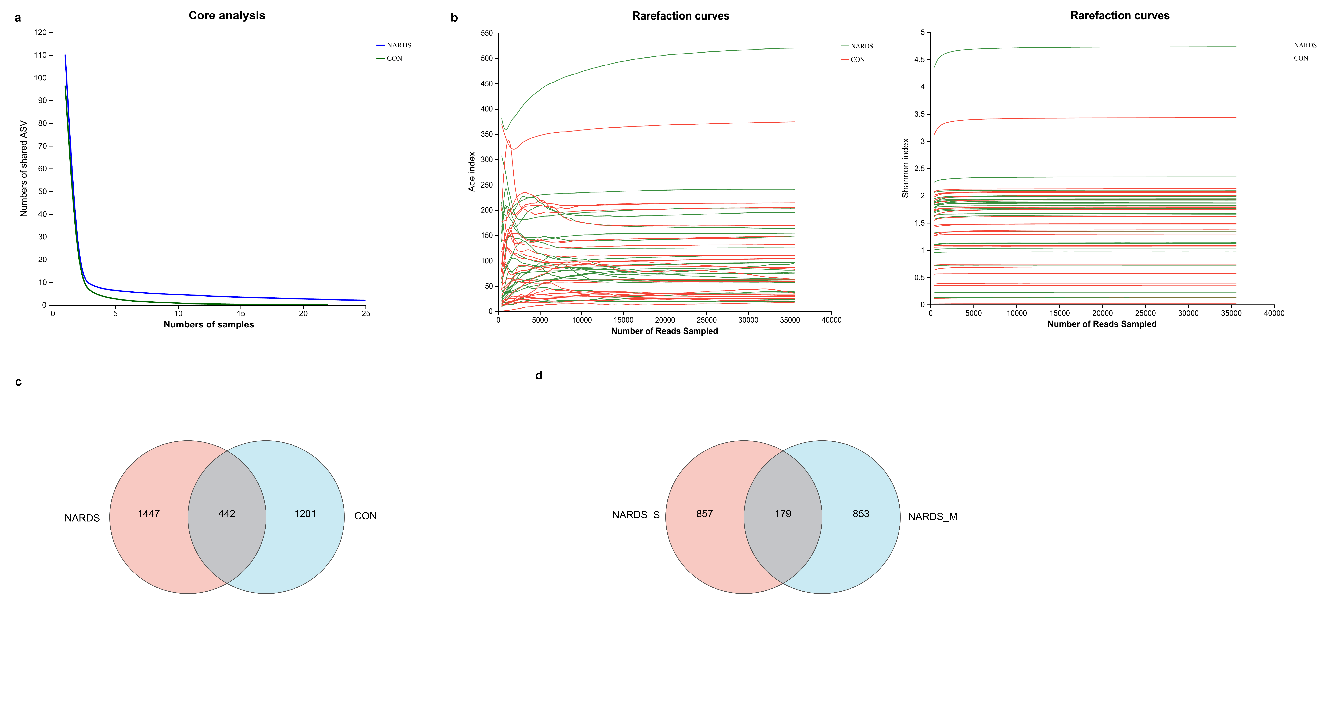


1. The Core curve showed an insignificant increase in core species amount with increasing sample size. (b) ACE and Shannon index rarefaction curves showed that ASV levels gradually plateau as sequencing depth increased. (c) Venn diagram illustrated the shared and unique OTUs in the feces between the NARDS and control groups. (d) Venn diagram illustrated the shared and unique OTUs in the feces between the NARDS_S and NARDS_M groups.

**Abbreviations:** ASV, amplicon sequence variant; NARDS, neonatal acute respiratory distress syndrome; CON, control; NARDS_S, moderate-to-severe NARDS; NARDS_M, mild NARDS.
